# Supplementary material
Source: PubMed Central journal article supplement (PMC4806770)
Supplement: supp_dc15-1606v151606_DC151606SupplementaryData.pdf [file supp_dc15-1606v151606_DC151606SupplementaryData.pdf]

SUPPLEMENTARY DATA

**Supplementary Table S1. Adverse Events by Treatment Arm within Age Cohort**

| Adverse Event Group                         | 4 to <8 years old |                |                | 8 to <12 years old |                |                | 12 to <17 years old |             |
|---------------------------------------------|-------------------|----------------|----------------|--------------------|----------------|----------------|---------------------|-------------|
|                                             | IM<br>N=6         | 2mg IN<br>N=12 | 3mg IN<br>N=12 | IM<br>N=6          | 2mg IN<br>N=11 | 3mg IN<br>N=12 | IM<br>N=12          | IN<br>N=13* |
| One or More Events                          | 5(83)             | 6(50)          | 5(42)          | 6(100)             | 5(46)          | 6(50)          | 7(58)               | 9(69)       |
| <b>Gastrointestinal</b>                     |                   |                |                |                    |                |                |                     |             |
| Abdominal pain (upper)                      | 1(17)             | 1(8)           | 0              | 0                  | 0              | 1(8)           | 0                   | 0           |
| Diarrhea                                    | 0                 | 0              | 0              | 1(17)              | 0              | 0              | 0                   | 0           |
| Nausea                                      | 4(67)             | 4(33)          | 2(17)          | 3(50)              | 1(9)           | 1(8)           | 1(8)                | 3(23)       |
| Vomiting                                    | 1(17)             | 1(8)           | 3(25)          | 3(50)              | 3(27)          | 4(33)          | 5(42)               | 4(31)       |
| Total (≥1 GI events) <sup>a</sup>           | 5(83)             | 5(42)          | 5(42)          | 5(83)              | 4(36)          | 6(50)          | 6(50)               | 6(46)       |
| <b>Head discomfort</b>                      |                   |                |                |                    |                |                |                     |             |
| Headache                                    | 0                 | 2(17)          | 1(8)           | 2(33)              | 2(18)          | 4(33)          | 1(8)                | 4(31)       |
| <b>Nasal</b>                                |                   |                |                |                    |                |                |                     |             |
| Nasal congestion                            | 0                 | 0              | 0              | 0                  | 0              | 0              | 0                   | 2(15)       |
| Nasal discomfort                            | 0                 | 0              | 2(17)          | 0                  | 0              | 0              | 0                   | 1(8)        |
| Sneezing                                    | 0                 | 0              | 0              | 0                  | 0              | 1(8)           | 0                   | 0           |
| Rhinalgia                                   | 0                 | 1(8)           | 0              | 0                  | 0              | 0              | 0                   | 0           |
| Total (≥1 nasal events) <sup>a</sup>        | 0                 | 1(8)           | 2(17)          | 0                  | 0              | 1(8)           | 0                   | 3(23)       |
| <b>Ocular</b>                               |                   |                |                |                    |                |                |                     |             |
| Eye irritation                              | 0                 | 0              | 0              | 0                  | 0              | 0              | 0                   | 1(8)        |
| Lacrimation increased                       | 0                 | 0              | 0              | 0                  | 1(9)           | 0              | 0                   | 0           |
| Ocular discomfort                           | 0                 | 0              | 0              | 0                  | 0              | 0              | 0                   | 1(8)        |
| Total (≥1 ocular events) <sup>a</sup>       | 0                 | 0              | 0              | 0                  | 1(9)           | 0              | 0                   | 2(15)       |
| <b>Sensory/Pain</b>                         |                   |                |                |                    |                |                |                     |             |
| Catheter site pain                          | 0                 | 1(8)           | 0              | 1(17)              | 0              | 0              | 0                   | 0           |
| Injection site discomfort                   | 2(33)             | 0              | 0              | 3(50)              | 0              | 0              | 0                   | 0           |
| Total (≥1 sensory/pain events) <sup>a</sup> | 2(33)             | 1(8)           | 0              | 3(50)              | 0              | 0              | 0                   | 0           |
| <b>Hypoglycemia</b>                         |                   |                |                |                    |                |                |                     |             |
| Hypoglycemia                                | 1(17)             | 0              | 0              | 0                  | 0              | 0              | 0                   | 0           |
| <b>Cardiovascular</b>                       |                   |                |                |                    |                |                |                     |             |
| Tachycardia                                 | 0                 | 1(8)           | 0              | 0                  | 0              | 0              | 0                   | 0           |
| <b>Neurological</b>                         |                   |                |                |                    |                |                |                     |             |
| Dizziness                                   | 0                 | 0              | 0              | 1(17)              | 0              | 0              | 0                   | 0           |

1 serious adverse event was reported in which a 7 year old participant (intramuscular treatment) experienced a hypoglycemic event after receiving a bolus of insulin with lunch. The participant received 90 grams of oral carbohydrates and made a full recovery.

\* 1 participant in the 12-<17 years old had a repeat 3 mg intranasal glucagon dosing visit due to a device malfunction leading to insufficient receipt of glucagon during the initial visit; both dosing visits were included in the safety analysis

<sup>a</sup> Number (%) of participants with at least 1 occurrence of the adverse event group

SUPPLEMENTARY DATA

**Supplementary Figure S1. Intranasal Glucagon device**

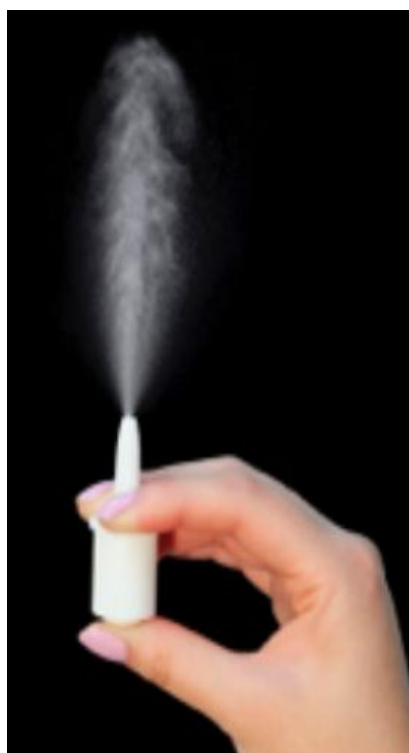

## SUPPLEMENTARY DATA

### List of Investigators

A listing of the T1D Exchange Clinic Network sites with participating principal investigators (PI), co-investigators (I), and coordinators (C) ordered by the number of participants recruited per site is included below:

**University of Buffalo School of Medicine and Biomedical Sciences, The State University of New York, Buffalo, NY** (n=14) Kathleen E. Bethin (PI); Lucy Mastrandrea (I); Michelle Ecker (C); Jessica Sickau (C); **Indiana University School of Medicine, Indianapolis, IN** (n=12) Linda A. DiMeglio (PI); Carmelle Evans-Molina (I); Stephanie Woerner (C); Jill Meier (C); Jennifer Terrell (C); Vanessa Patrick (C); **University of Pennsylvania Perelman School of Medicine, Philadelphia, PA** (n=12) Michael R. Rickels (PI); Anastasia Amaro (I); Patricia Bourne (C); Amy Pelekis (C); **Yale School of Medicine, New Haven, CT** (n=12) Jennifer Sherr (PI); William Tamborlane (I); Amy Steffen (C); Melinda Zgorski (C); Kate Weyman (C); Eileen Tichy (C); Neha Patel (C); **Barbara Davis Center for Childhood Diabetes, Aurora, CO** (n=11) R. Paul Wadwa (PI); Georgenna J. Klingensmith (I); David M. Maahs (I); Katherine Manseau (C); Nhung Nguyen (C); Laurel Messer (C); Sally Sullivan (C); **Oregon Health and Science University Harold Schnitzer Diabetes Health Center, Portland, OR** (n=10) Andrew J. Ahmann (PI); Bethany Klopfenstein (I); Bethany Wollam (C); Bradley White (C); Christopher Bogan (C); Rebecca Fitch (C); Jennifer Cox (C); **University of Florida, Gainesville, FL** (n=5) Desmond A. Schatz (PI); Michael J. Haller (I); Miriam Cintron (C); Jamie Thomas (C); **University of Minnesota, Minneapolis, MN** (n=4) Brandon M. Nathan (PI); Janice Leschyshyn (C); **Nemour's Children's Children's Speciality Care, Jacksonville, FL** (n=#) Larry Fox (PI); Kim Englert (C); Kaitlin Sikes (C)
